chronic opioid withdrawal by a selective soluble guanylyl cyclase inhibitor. *Brain Res* 2000; 859:45-56

157. Pineda J, Torrecilla M, Martin-Ruiz R, Ugedo L: Attenuation of withdrawal-induced hyperactivity of locus coeruleus neurons by inhibitors of nitric oxide synthase in morphine-dependent rats. *Neuropharmacology* 1998; 37:759-67

158. Javelle N, Berod A, Renaud B, Lambas-Senas L: NO synthase inhibitors attenuate locus coeruleus catecholamine metabolism and behavior induced by morphine withdrawal. *Neuroreport* 2002; 13:725-8

159. Feng P, Meissler JJ, Adler MW, Eisenstein TK: Morphine withdrawal sensitizes mice to lipopolysaccharide: elevated TNF- $\alpha$  and nitric oxide with decreased IL12. *J Neuroimmunol* 2005; 164:57-65

160. Buccafusco JJ, Terry AV, Shuster L: Spinal NMDA receptor-nitric oxide mediation of the expression of morphine withdrawal symptoms in the rat. *Brain Res* 1995; 679:189-99

161. Gao JL, Zeng YM, Zhang LC, Gu J, Liu HF, Zhou WH, Yang GD: NO mediated increase of Fos protein and NMDA1A R mRNA expression in rat spinal cord during morphine withdrawal. *Acta Pharmacol Sin* 2001; 22:505-11

162. Harlan RE, Webber DS, Garcia MM: Involvement of nitric oxide in morphine-induced c-Fos expression in the rat striatum. *Brain Res Bull* 2001; 54:207-12

163. Cao JL, Liu HL, Wang JK, Zeng YM: Cross talk between nitric oxide and ERK1/2 signaling pathway in the spinal cord mediates naloxone-precipitated withdrawal in morphine-dependent rats. *Neuropharmacology* 2006; 51:315-26

164. Chou WB, Zeng YM, Duan SM, Zhou WH, Gu J, Yang GD: M<sub>2</sub> muscarinic receptor of spinal cord mediated increase of nNOS expression in locus coeruleus during morphine withdrawal. *Acta Pharmacol Sin* 2002; 23: 691-7

## ■ ANESTHESIOLOGY REFLECTIONS

### Bronze of M.T. "Pepper" Jenkins, M.D.

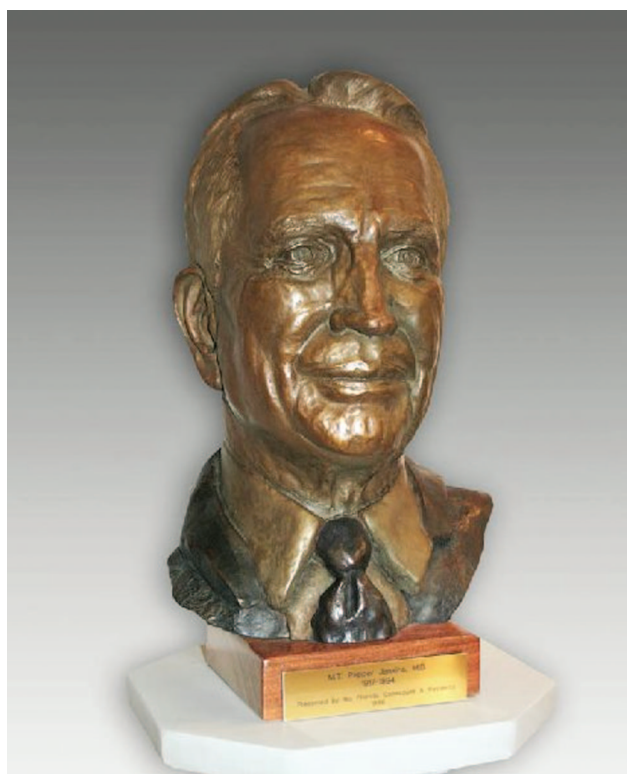

Anesthesiologist-in-Chief at Dallas' University of Texas Southwest Medical Center (UTSWMC) from 1948–1981, Marion Thomas "Pepper" Jenkins (1917–1994) served as UTSWMC's first McDermott Chair after his professorship was funded by a grateful founding family of Texas Instruments, Inc. A codesigner of teaching laryngoscopes, Dr. Jenkins received worldwide attention after he pronounced the death of President John F. Kennedy at Parkland Memorial Hospital on November 22, 1963. After serving as American Society of Anesthesiologists (ASA) president in 1972, Dr. Jenkins received Distinguished Service Awards from the ASA in 1978 and from the American Medical Association a decade later. A trustee and vice-president of the Wood Library-Museum of Anesthesiology (WLM), Pepper delivered the WLM's 1993 Lewis H. Wright Memorial Lecture, titled "Epochs in Intravenous Fluid Therapy: From the Goose Quill and Pig Bladder to Balanced Salt Solutions." Afterwards he quipped, "Yes, Pepper loves salt." Pictured here is a bronze bust, "M.T. Pepper Jenkins, M.D.," completed by his friend and colleague, surgeon-sculptor Ben Wilson, M.D., just 1 yr after Dr. Jenkins' passing. (Copyright © the American Society of Anesthesiologists, Inc. This image appears in the *Anesthesiology Reflections* online collection available at [www.anesthesiology.org](http://www.anesthesiology.org).)

George S. Bause, M.D., M.P.H., Honorary Curator, ASA's Wood Library-Museum of Anesthesiology, Park Ridge, Illinois, and Clinical Associate Professor, Case Western Reserve University, Cleveland, Ohio. [UJYC@aol.com](mailto:UJYC@aol.com).
